# Supplementary material
Source: PubMed Central journal article supplement (PMC6343717)

**Figure S1. [Neratinib + palbociclib] interact to activate eIF2 $\alpha$ , ATM, AMPK, ULK-1 and**

**inactivate mTOR, ERK1/2, AKT and STAT3. A.** 4T1 cells were treated with vehicle control or with [neratinib (100 nM) + palbociclib (100 nM)] for 6h. Cells were fixed in place and at least forty cells per condition were imaged in independent triplicate and the intensity ratio of phosphorylated protein levels to total protein expression plotted as a percentage of control treatment (n = 3 +/- SD). # p < 0.05 greater than vehicle control; \* p < 0.05 less than vehicle control. **B.** Spiky ovarian cancer cells were treated with vehicle control, neratinib (100 nM), palbociclib (100 nM) or the drugs in combination for 6h. Cells were fixed in place and at least forty cells per condition were imaged in independent triplicate and the intensity ratio of phosphorylated protein levels to total protein expression plotted as a percentage of control treatment (n = 3 +/- SD). # p < 0.05 greater than vehicle control; \* p < 0.05 less than vehicle control. **C.** Tumors cells as indicated were treated with vehicle control or treated with palbociclib (100 nM) for 4h. Cells were fixed in place and at least forty cells per condition were imaged in independent triplicate and the intensity ratio of phosphorylated AMPK $\alpha$  T172 levels to total AMPK $\alpha$  protein expression plotted as a percentage of control treatment (n = 3 +/- SD). # p < 0.05 greater than vehicle control.

**Figure S2. [Neratinib + palbociclib] enhances the expression of BIM, Beclin1 and ATG5 that is suppressed by expression of activated MEK1 or activated AKT** Spiky ovarian cancer cells were transfected with empty vector (CMV) or to express the indicated “activated” proteins. Twenty-four h after transfection cells were treated with vehicle control or with [neratinib (100 nM) + palbociclib (100 nM)] for an additional 6h. Cells were fixed in place and at least forty cells per condition were imaged in independent triplicate and the intensity ratio of phosphorylated protein levels to total protein expression was determined (n = 3 +/- SD). \* p < 0.05 less intensity in the corresponding value in vehicle control; \* p < 0.05 greater intensity in the corresponding value in vehicle control; ¶ p < 0.05 greater intensity than corresponding value in CMV transfected cells; \*\* p < 0.05 lower percentage reduction in intensity than in CMV cells; ## p < 0.05 lower percentage increase in intensity than in CMV cells.

**Figure S3. [Neratinib + palbociclib + valproate] modulates protein expression and protein phosphorylation in mouse CT26 colon cancer cells.** CT26 mouse colon cancer cells were treated with vehicle control, [neratinib (100 nM) + palbociclib (100 nM)], sodium valproate (250  $\mu$ M) or the drugs in combination for 4h and for 8h. Cells were fixed in place and at least forty cells per condition were imaged in independent triplicate and the intensity ratio of phosphorylated protein levels to total protein expression was determined (n = 3 +/- SD). \* p < 0.05 less intensity in the corresponding value in vehicle control; # p < 0.05 greater intensity in the corresponding value in vehicle control; \*\* p < 0.05 lower intensity than in individual drug-treated cells; ## p < 0.05 greater intensity than in individual drug-treated cells.

**Figure S4. [Neratinib + palbociclib] in mouse CT26 colon cancer cells cause K-RAS to localize in punctate structures close to the plasma membrane.** CT26 mouse colon cancer cells were treated with vehicle control or [neratinib (100 nM) + palbociclib (100 nM)] for 4h. Cells were fixed in place and immunostaining performed to detect total ERK2 levels and total K-RAS levels. The images were super-imposed and examined at 10X magnification.

**Figure S5. [Neratinib + palbociclib] reduces the expression of PD-L1 and IDO-1, and enhances the expression of MHCA, in mammary carcinoma cells.** Cells were treated with vehicle control or with [neratinib (100 nM) + palbociclib (100 nM)] for 6h. Cells were fixed in place and immune-staining performed to determine the expression levels of PD-L1, PD-L2, MHCA, IDO-1 and HMGB1. The blue arrows with HMGB1 indicate where the protein has been expelled from the cells following drug exposure.

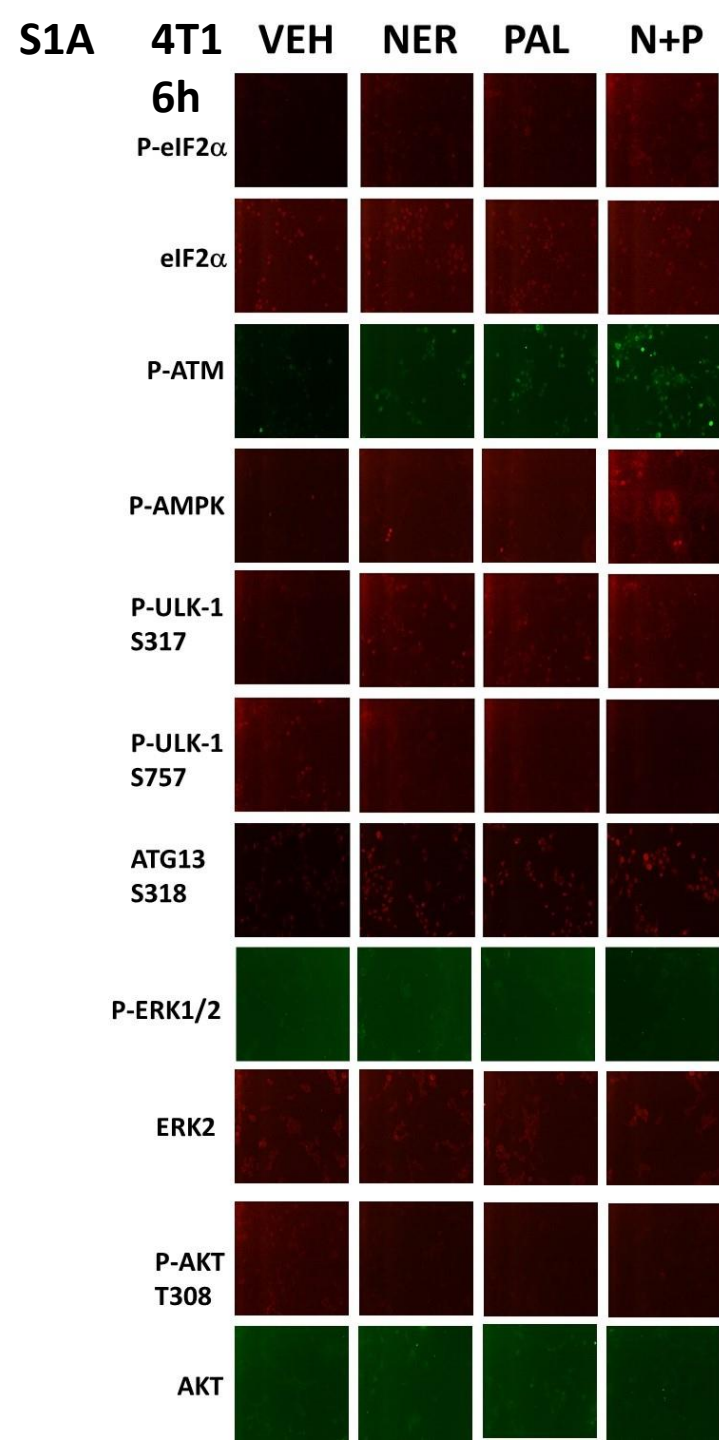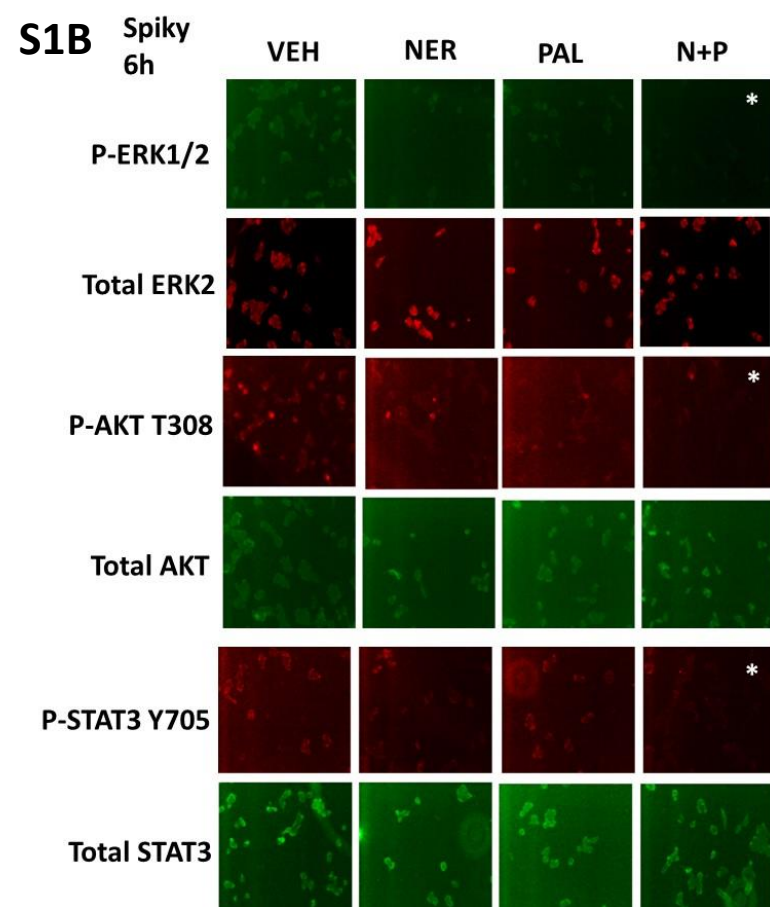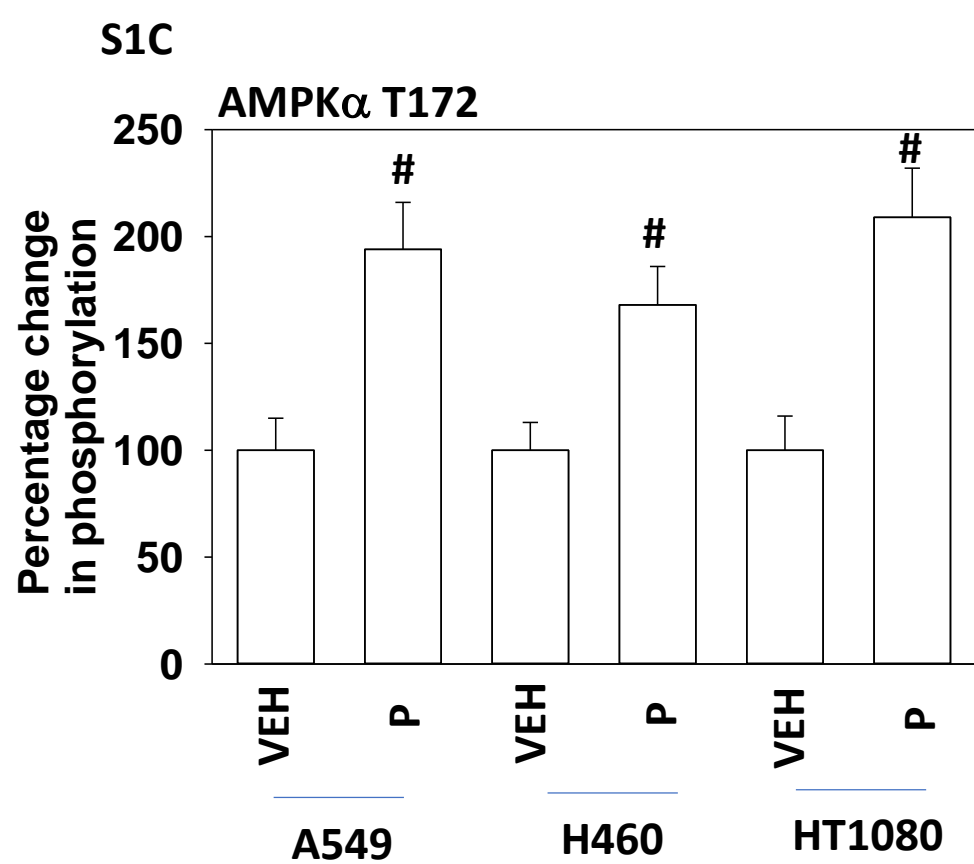

S2

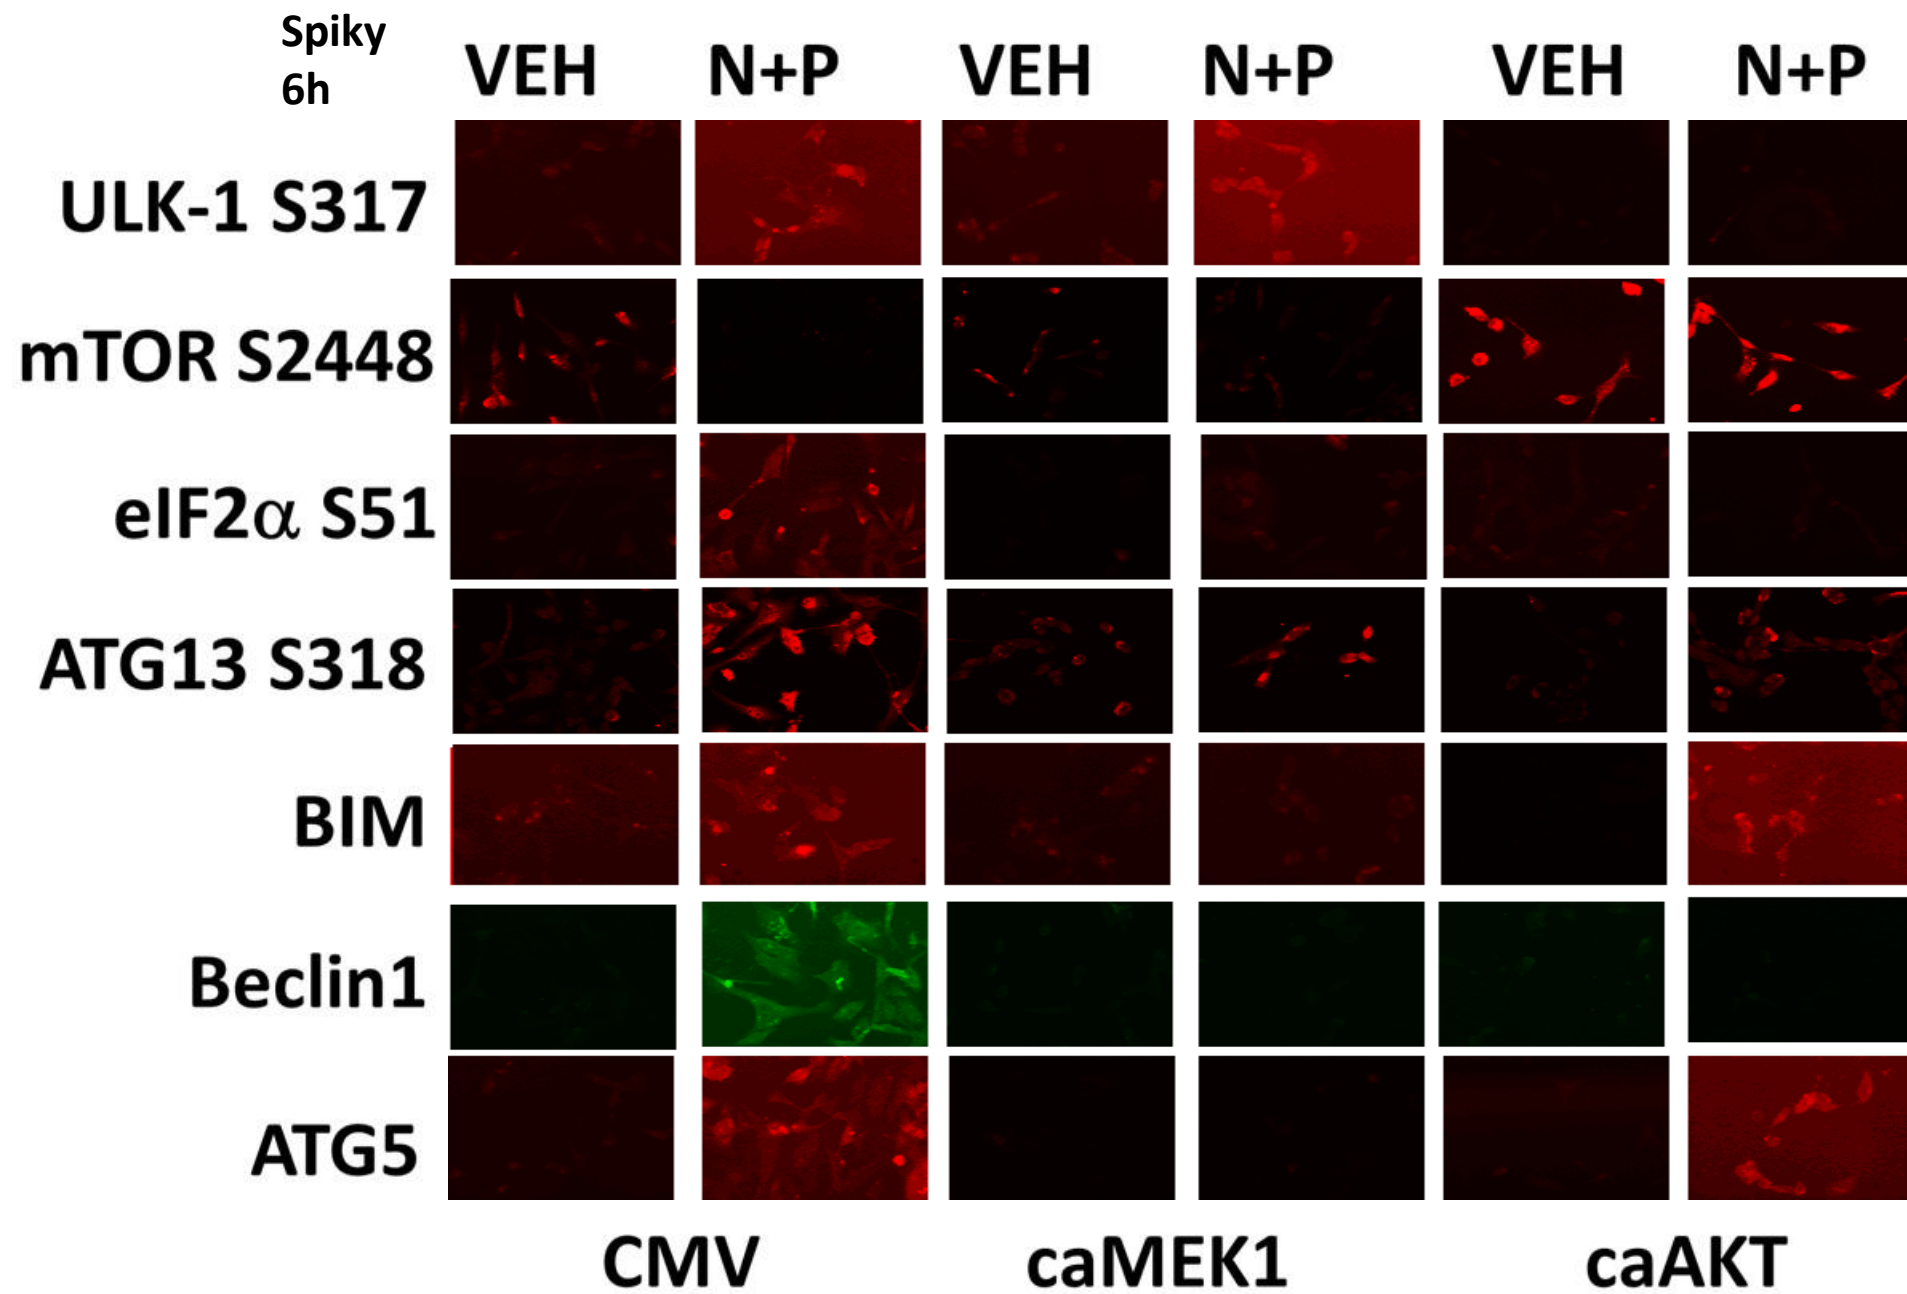

**S3**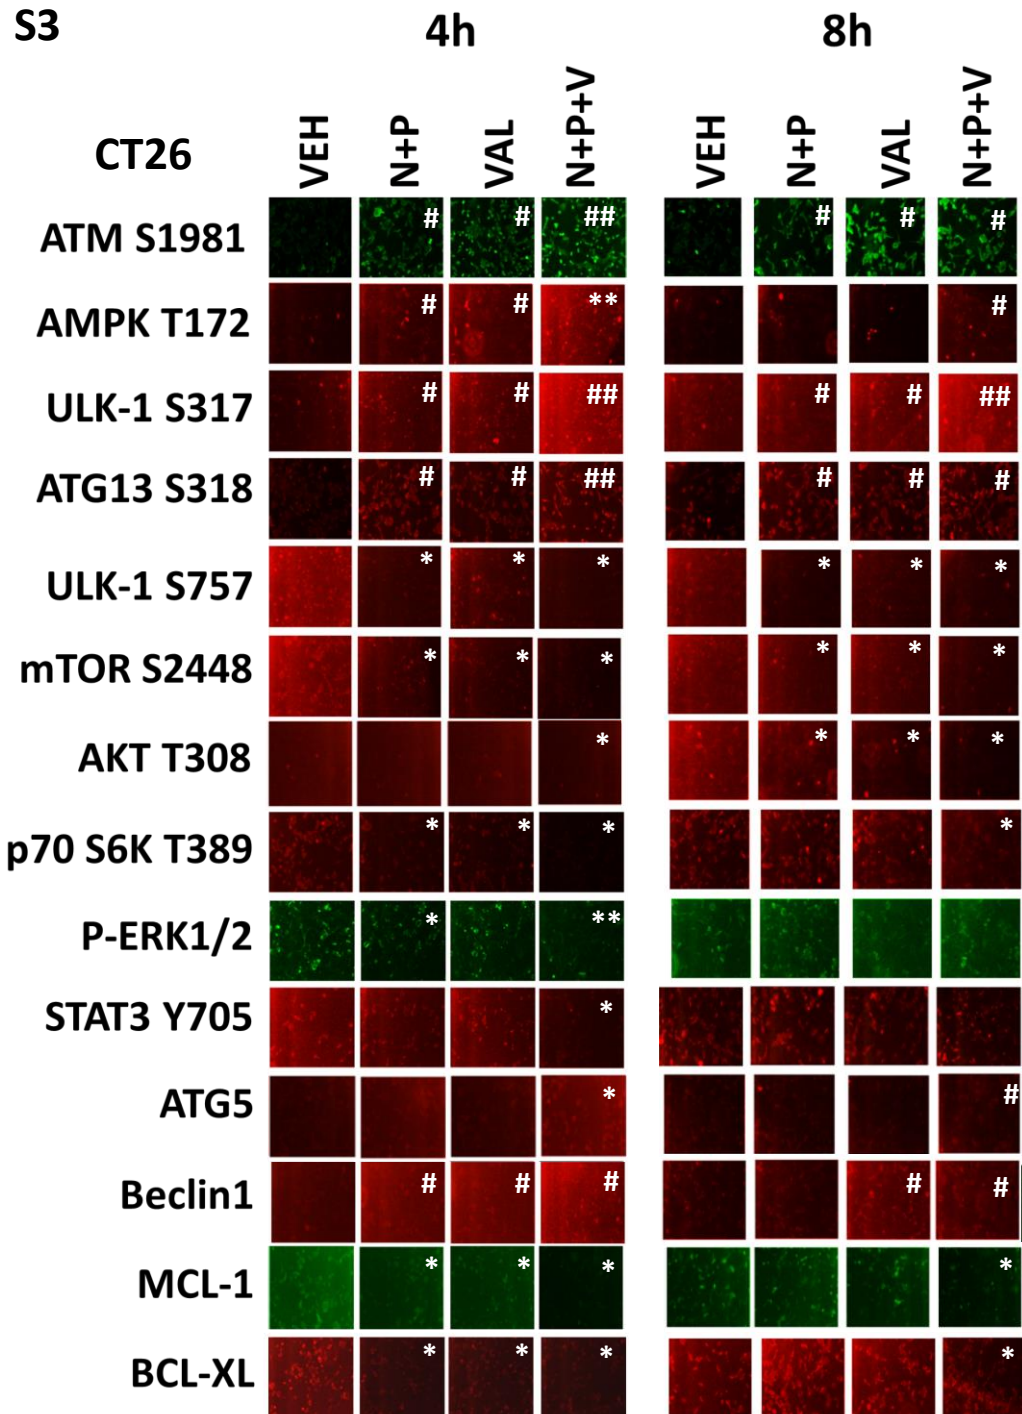



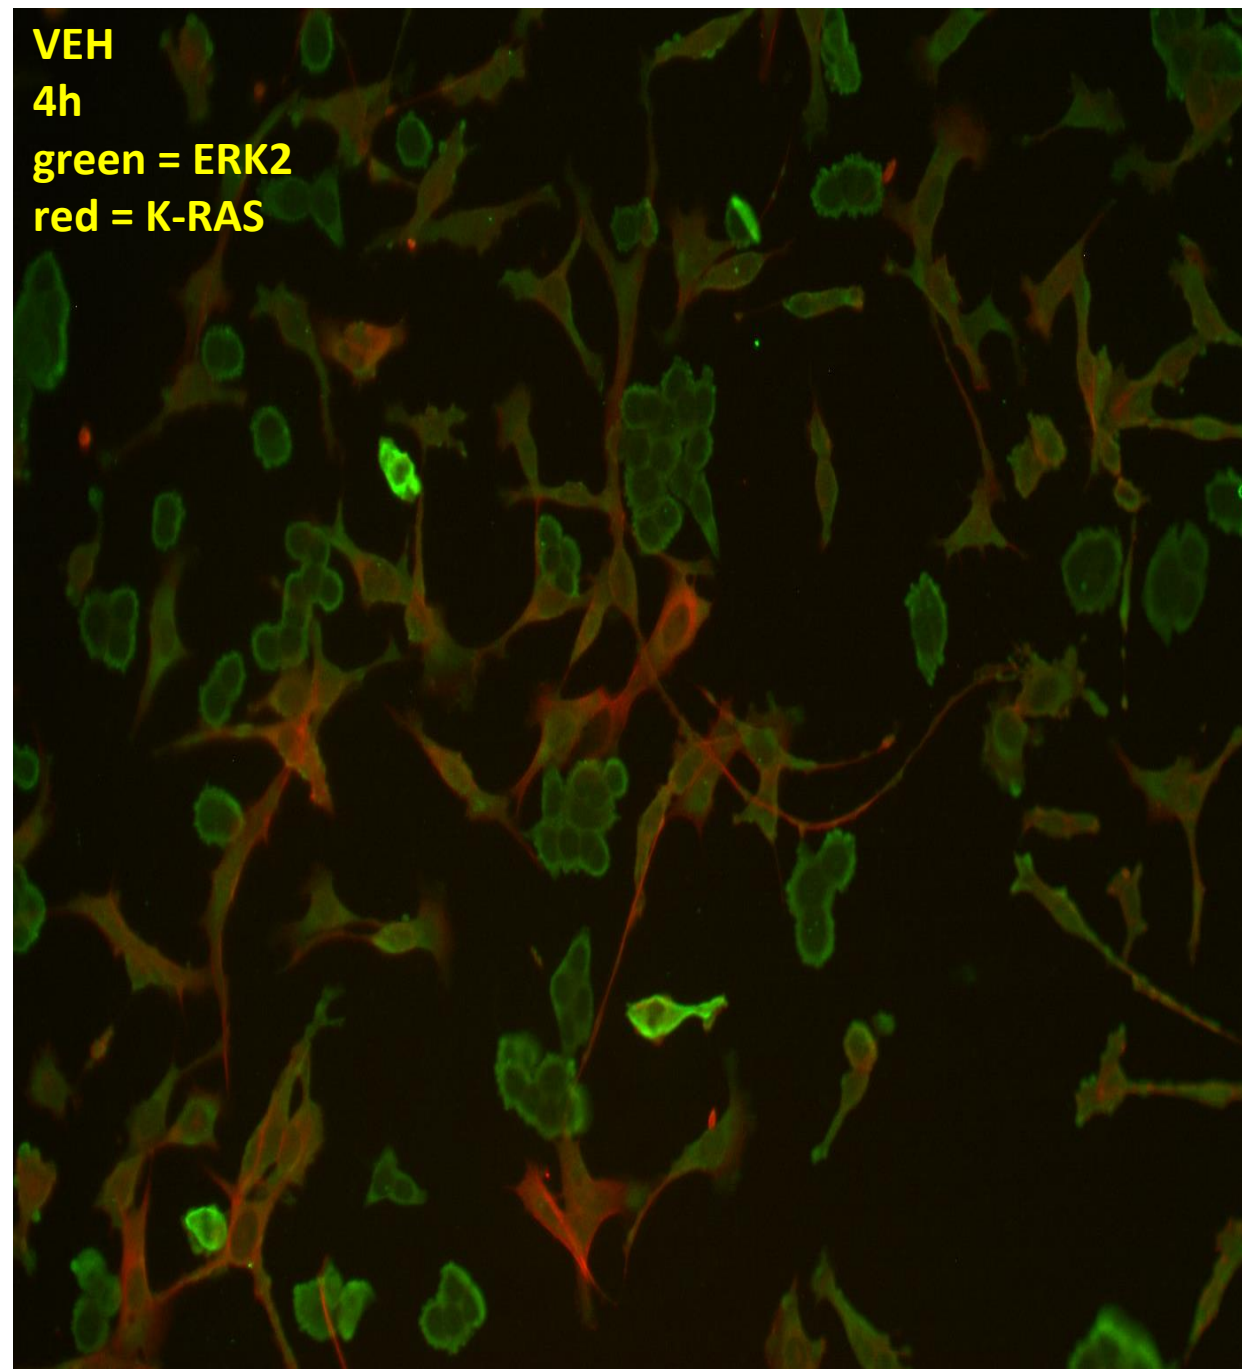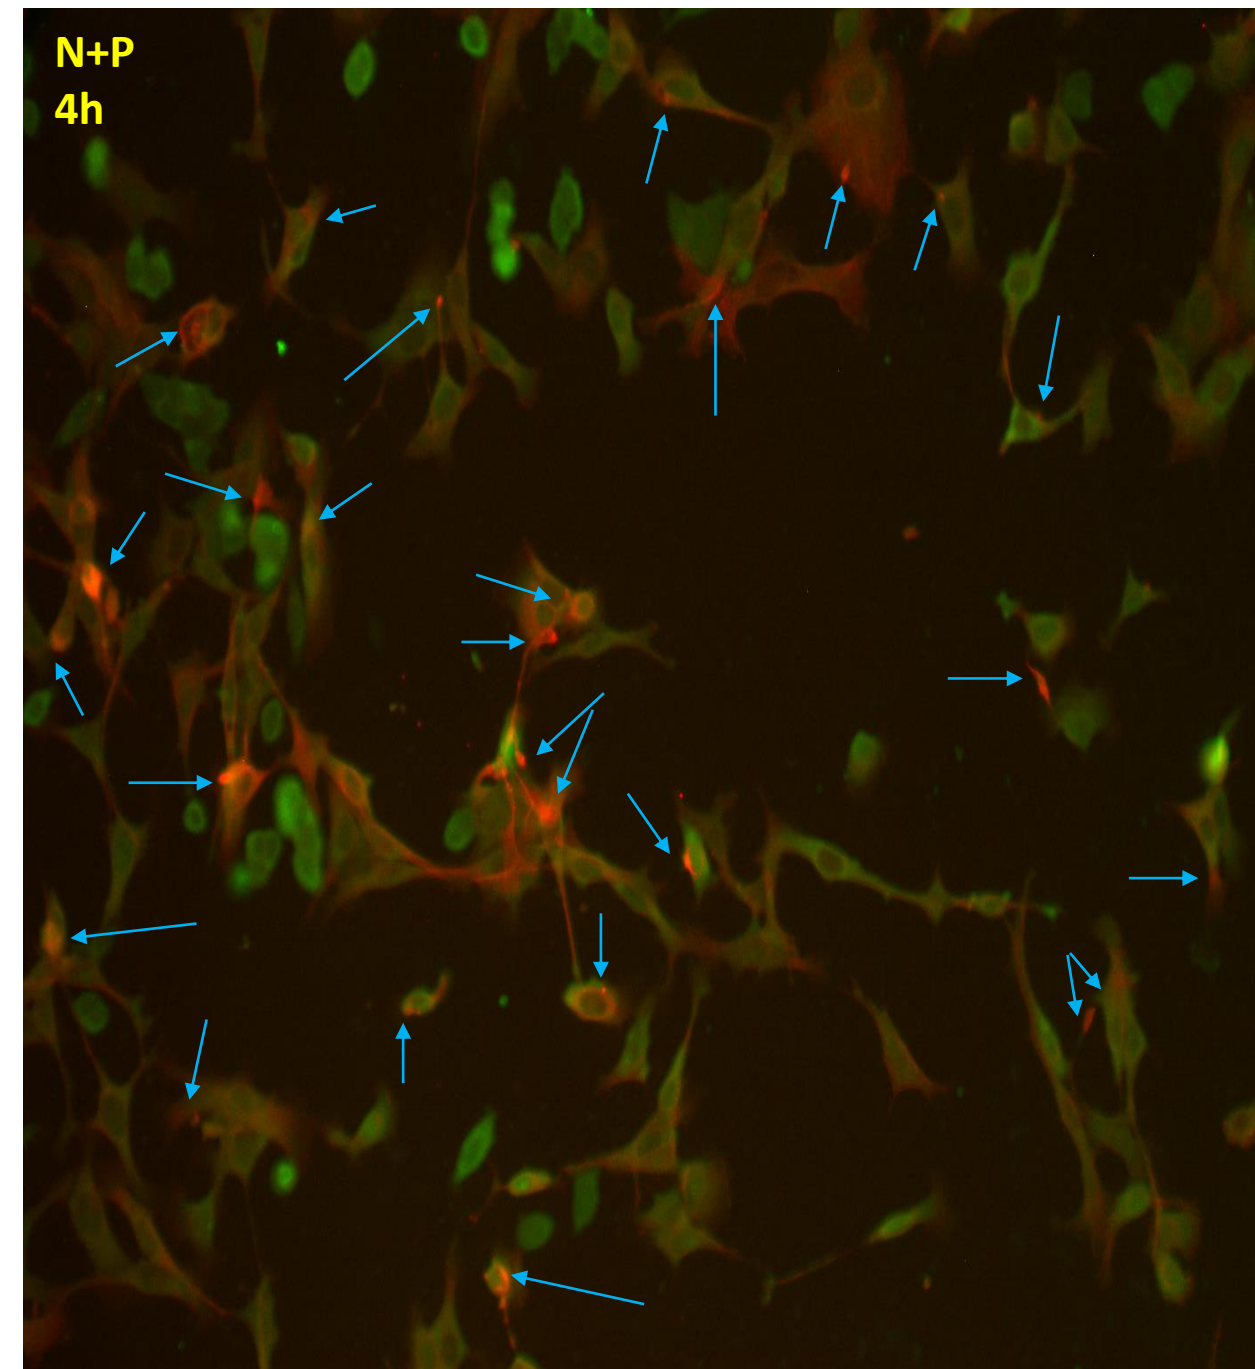

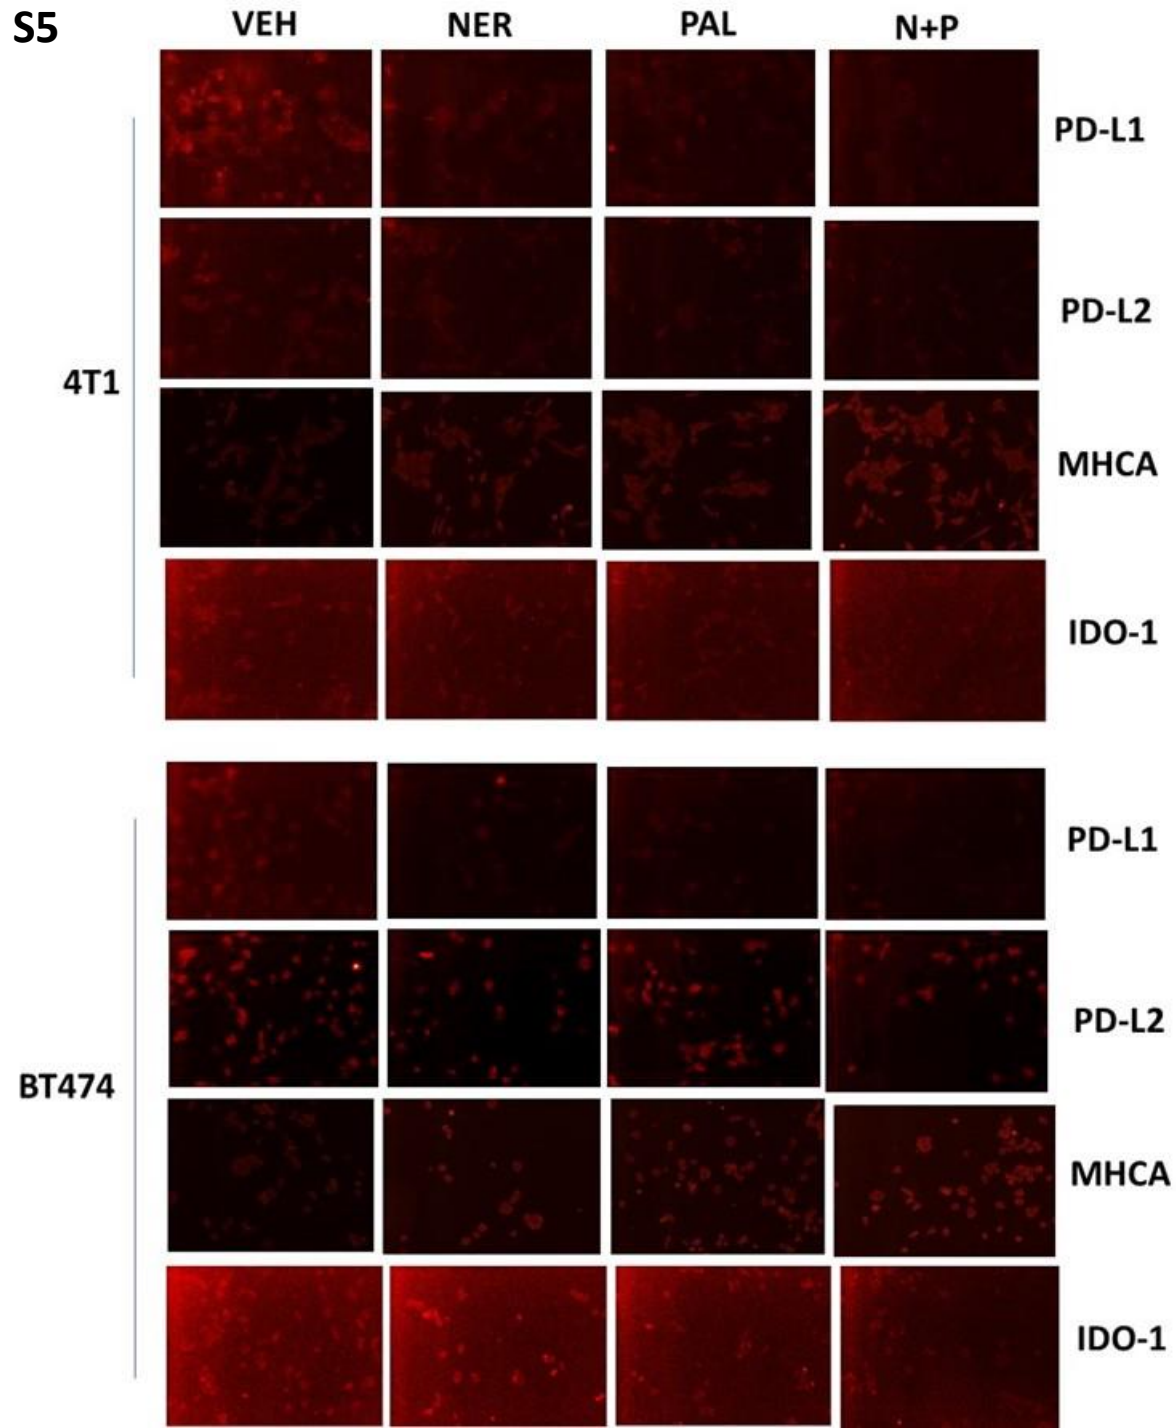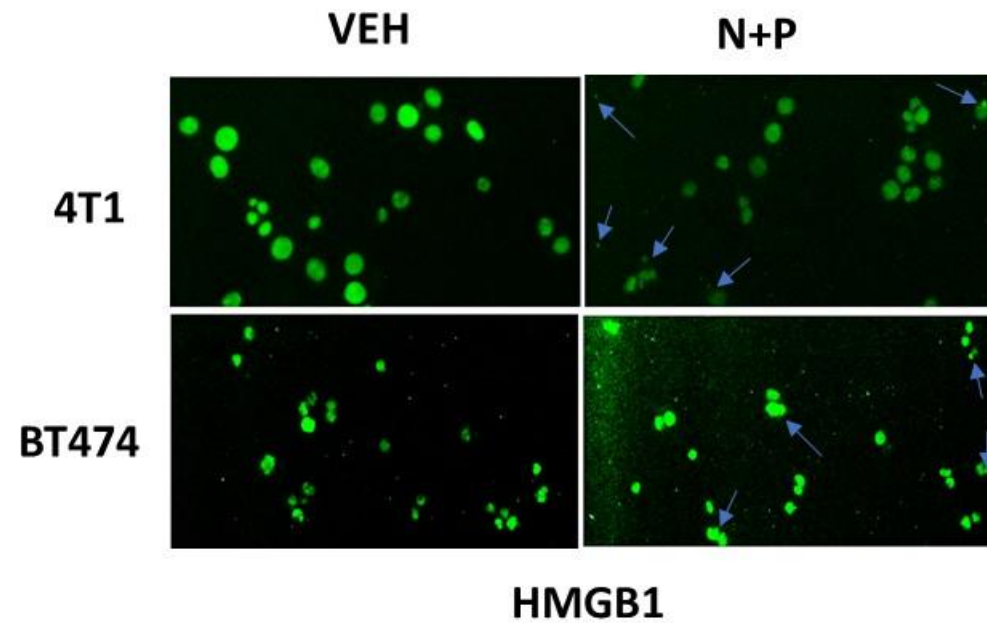

Supplement: kcbt-20-02-1507665-s001.pdf [file kcbt-20-02-1507665-s001.pdf]
